# Supplementary material for: A single-cell compendium of human cerebrospinal fluid identifies disease-associated immune cell populations
Source: JCI journal article supplement (doi:10.1172/jci177793), 2025-01-01

▣ PBMC 
 ▣ CSF

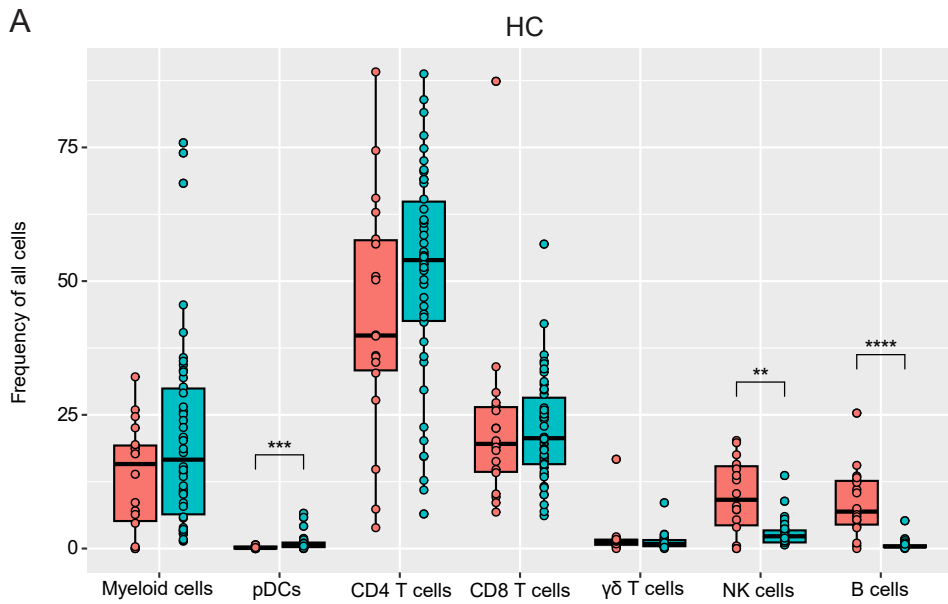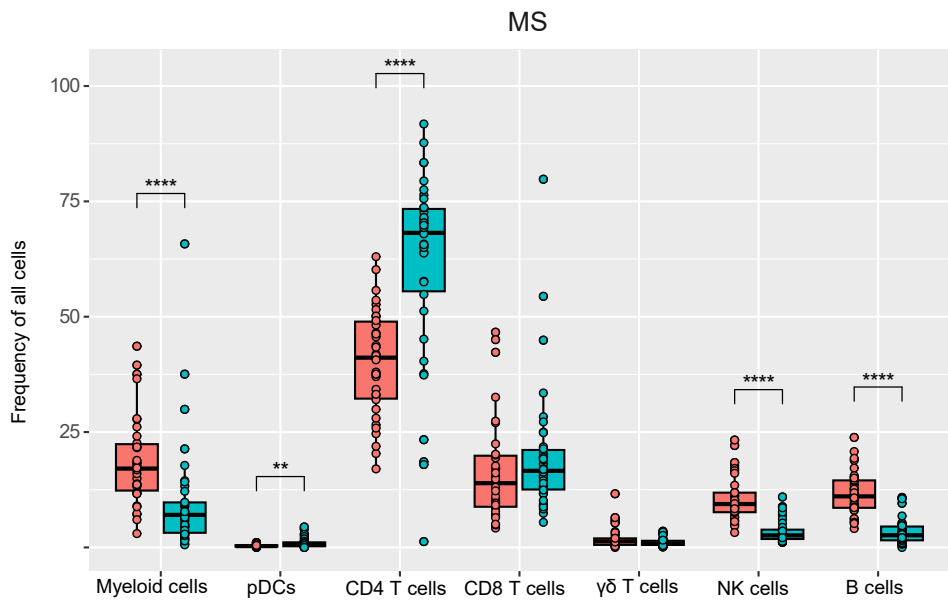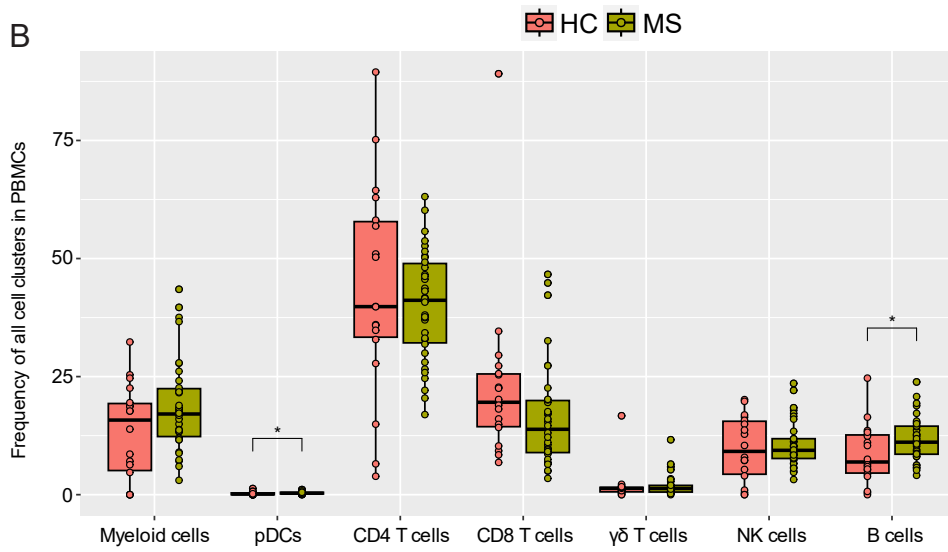

# Supplemental Figure 2

**A**

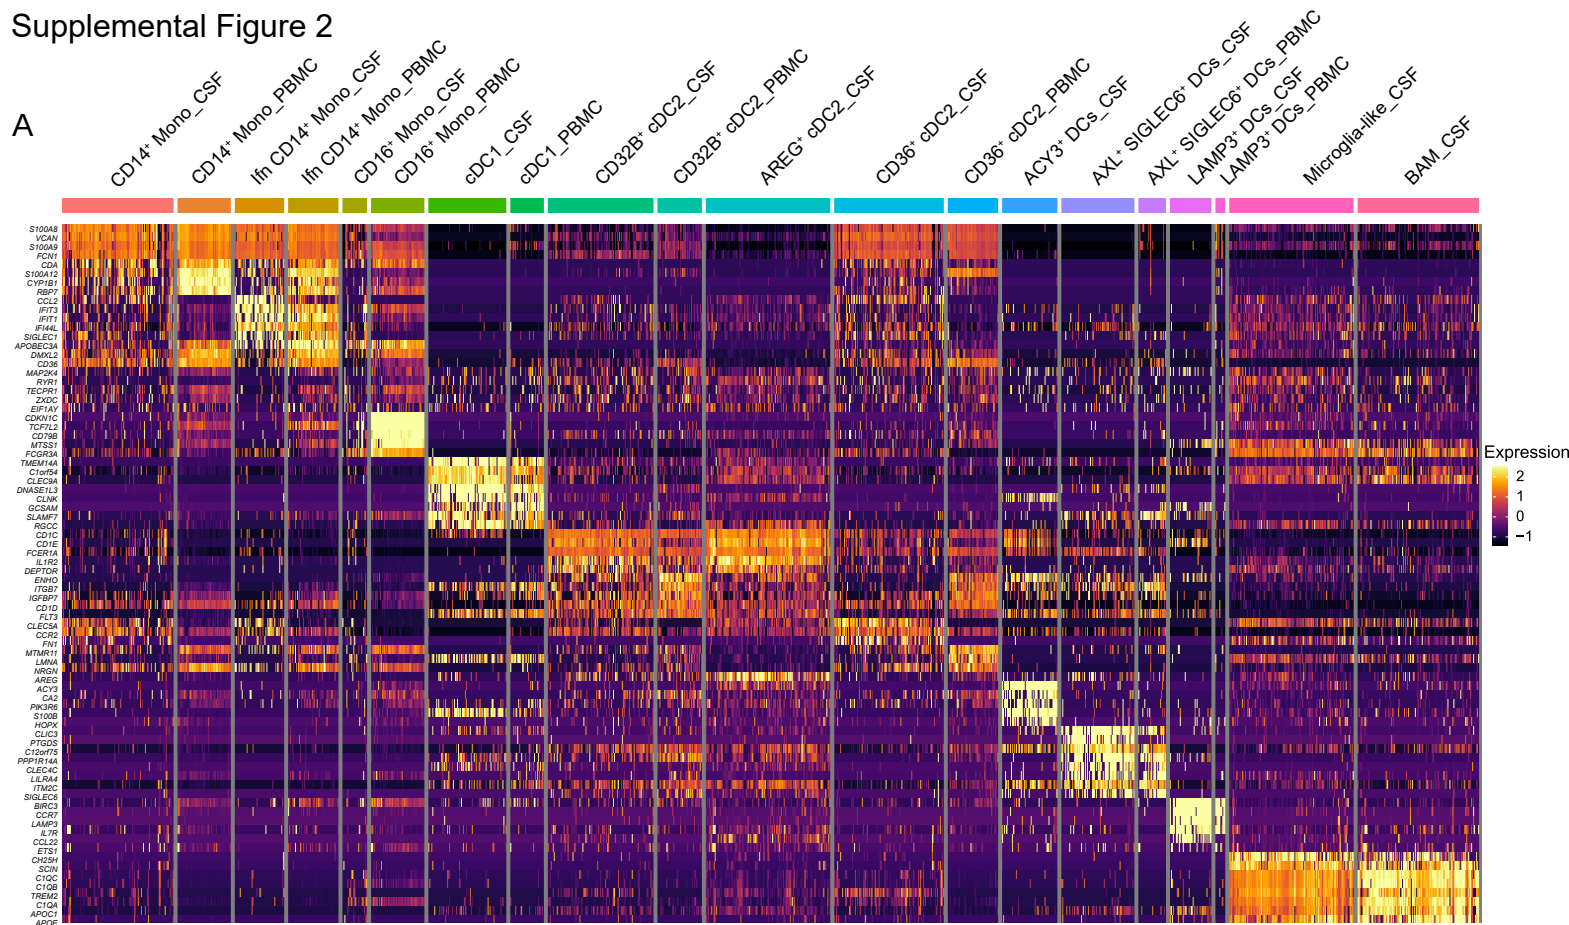

**B**

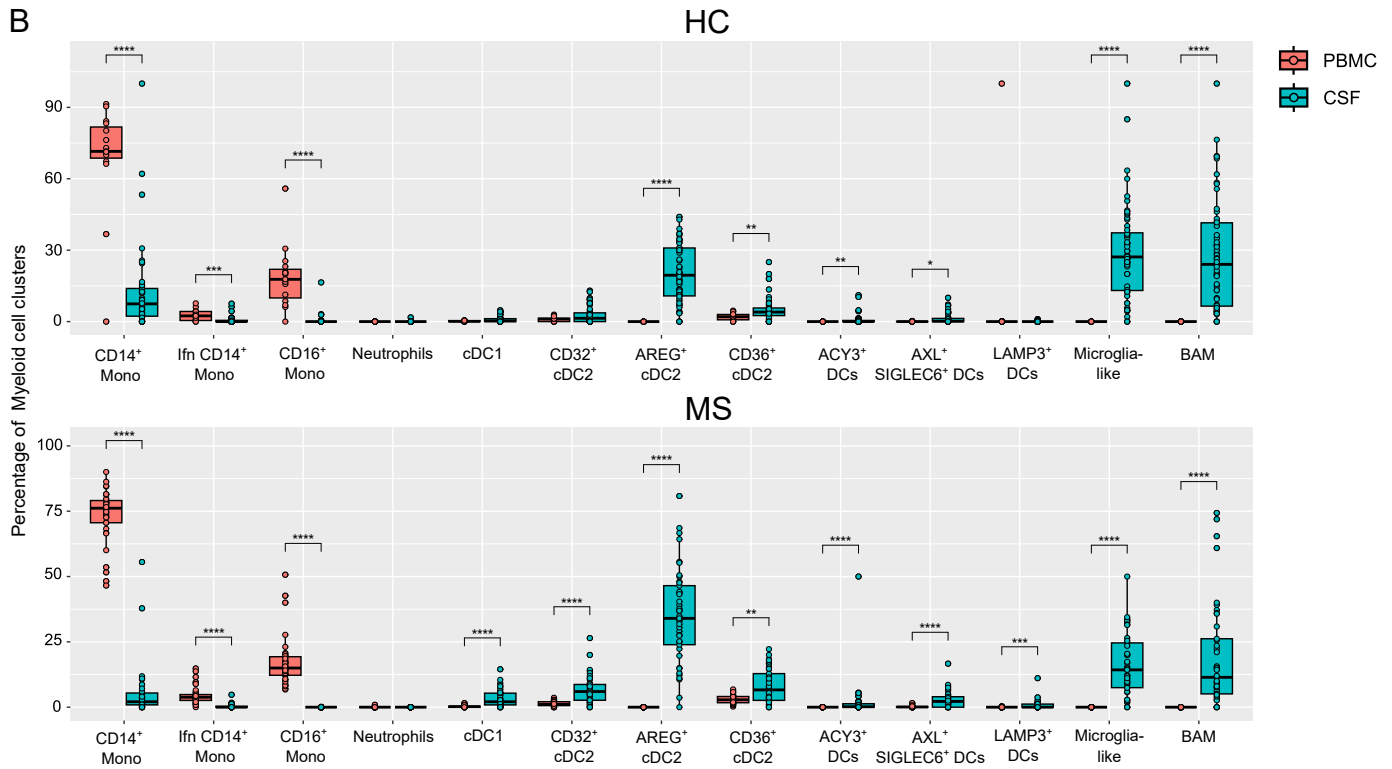

**C**

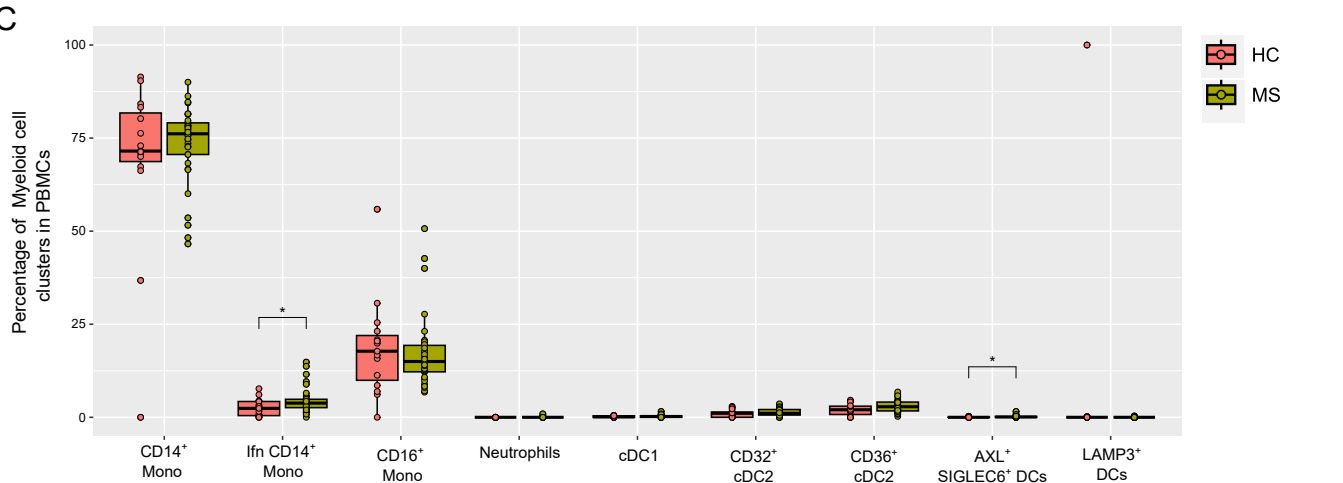

# Supplemental Figure 3

A

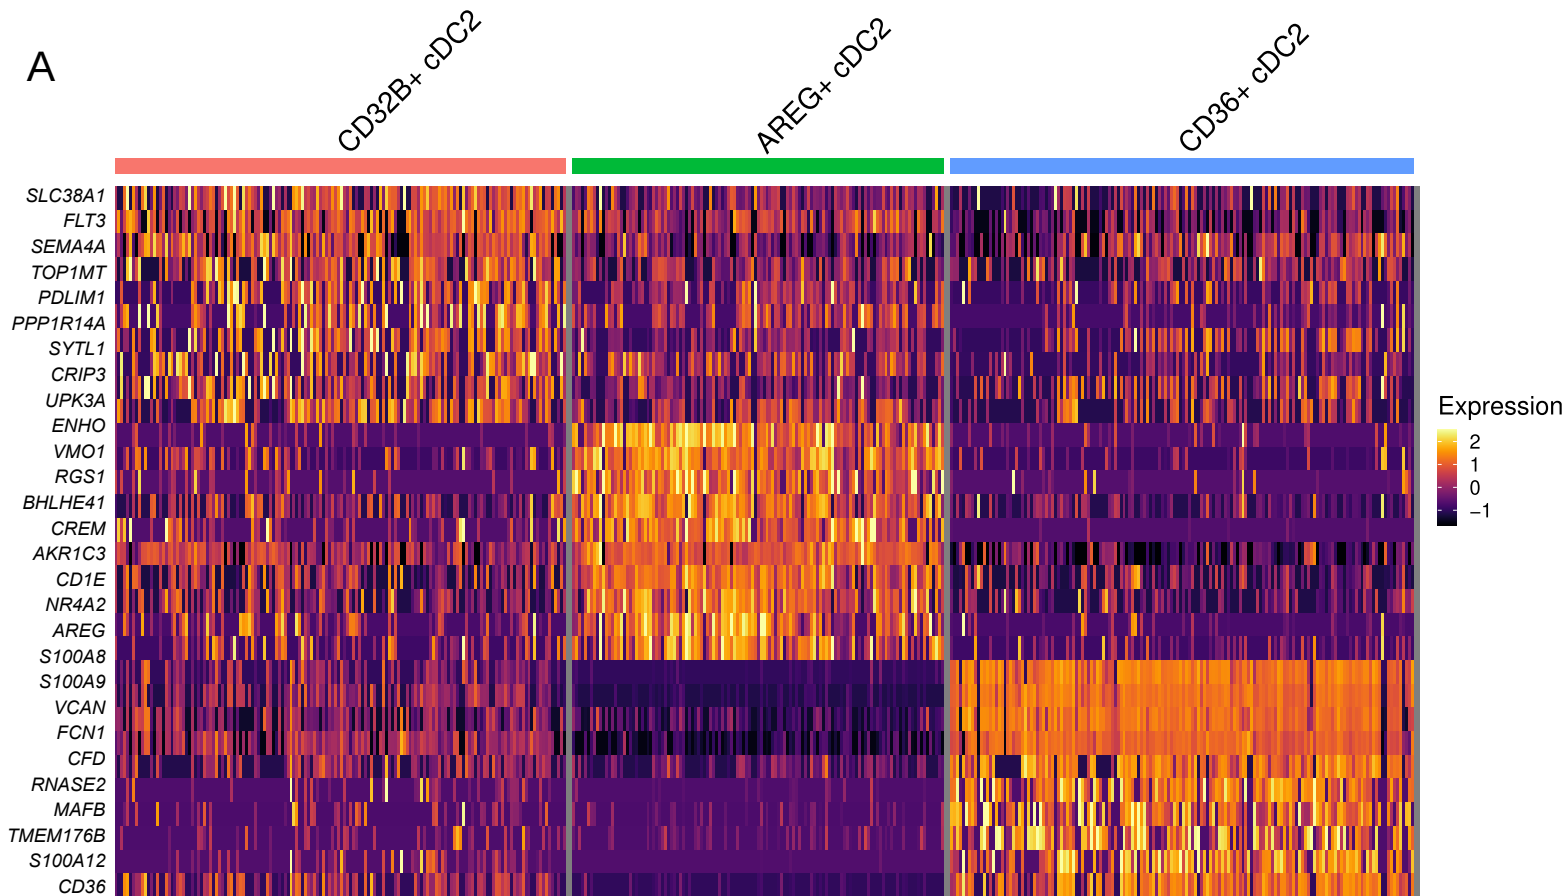

B

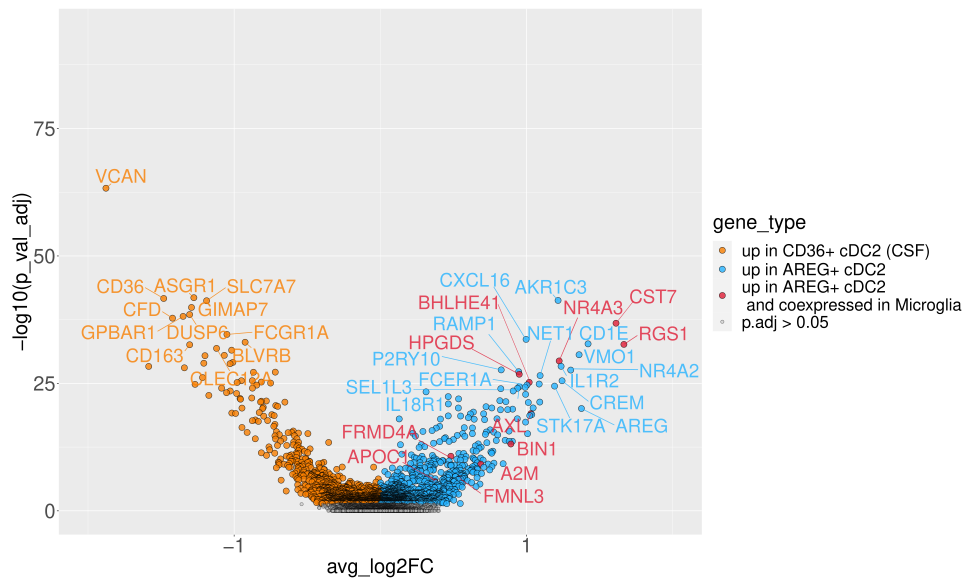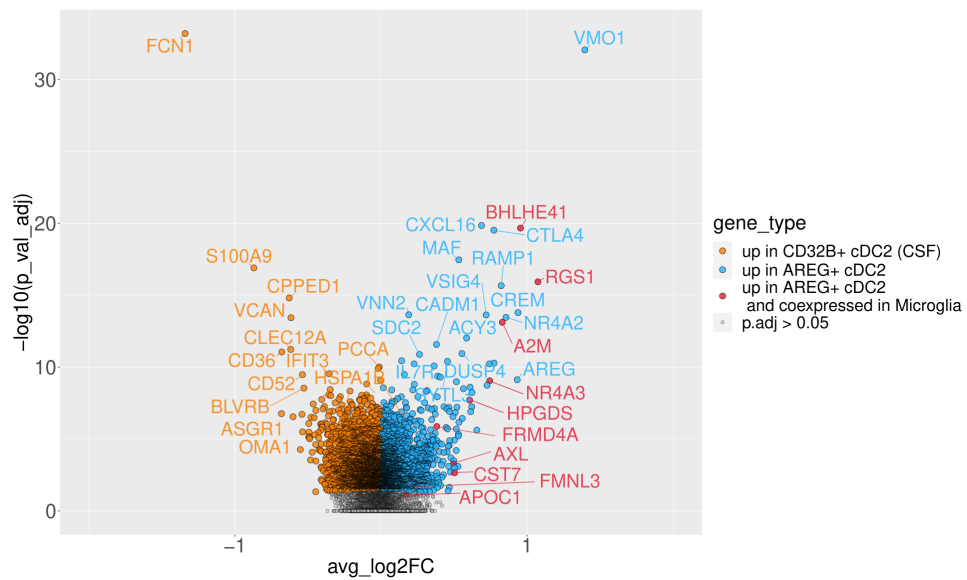

# Supplemental Figure 4 - Gating Strategy

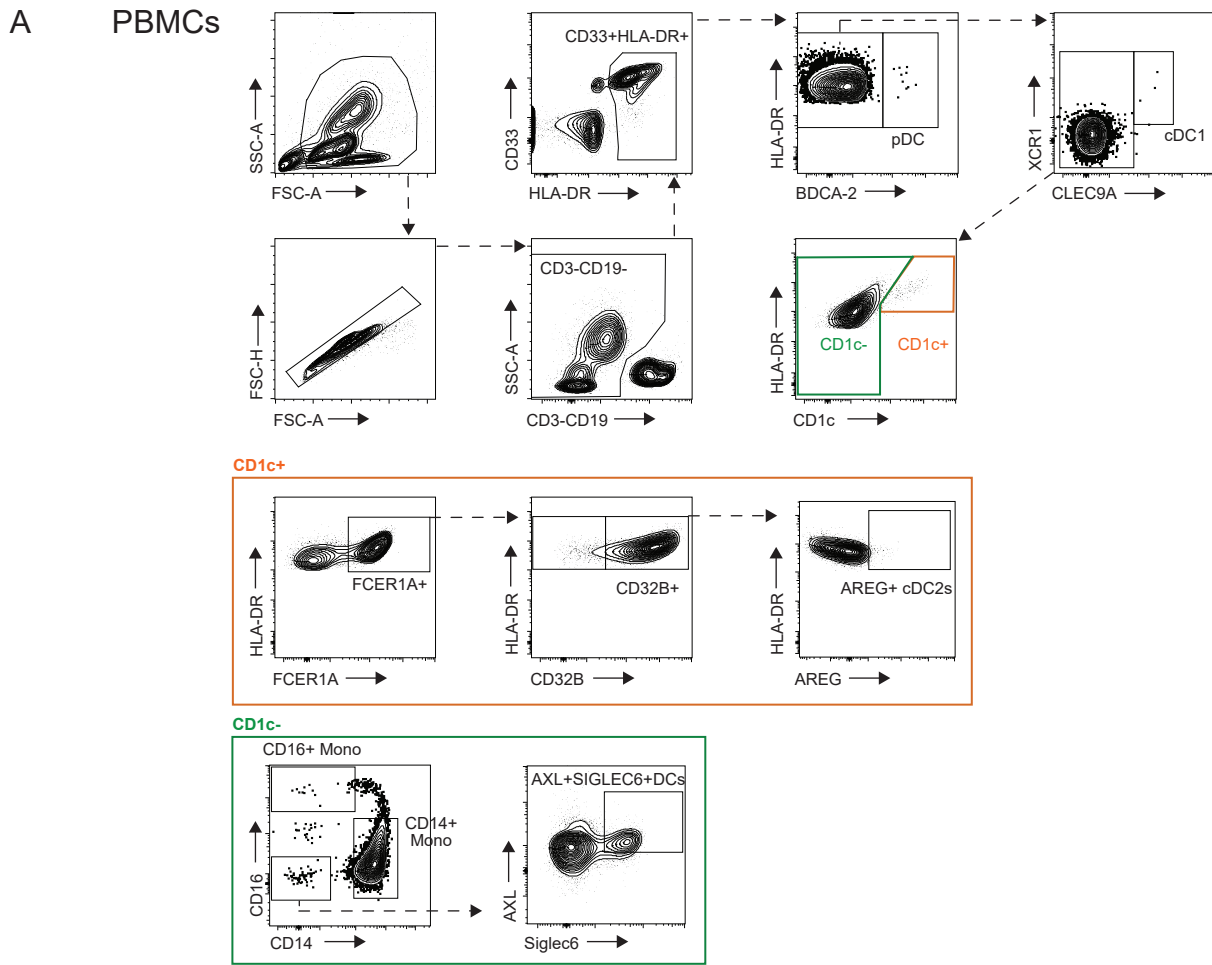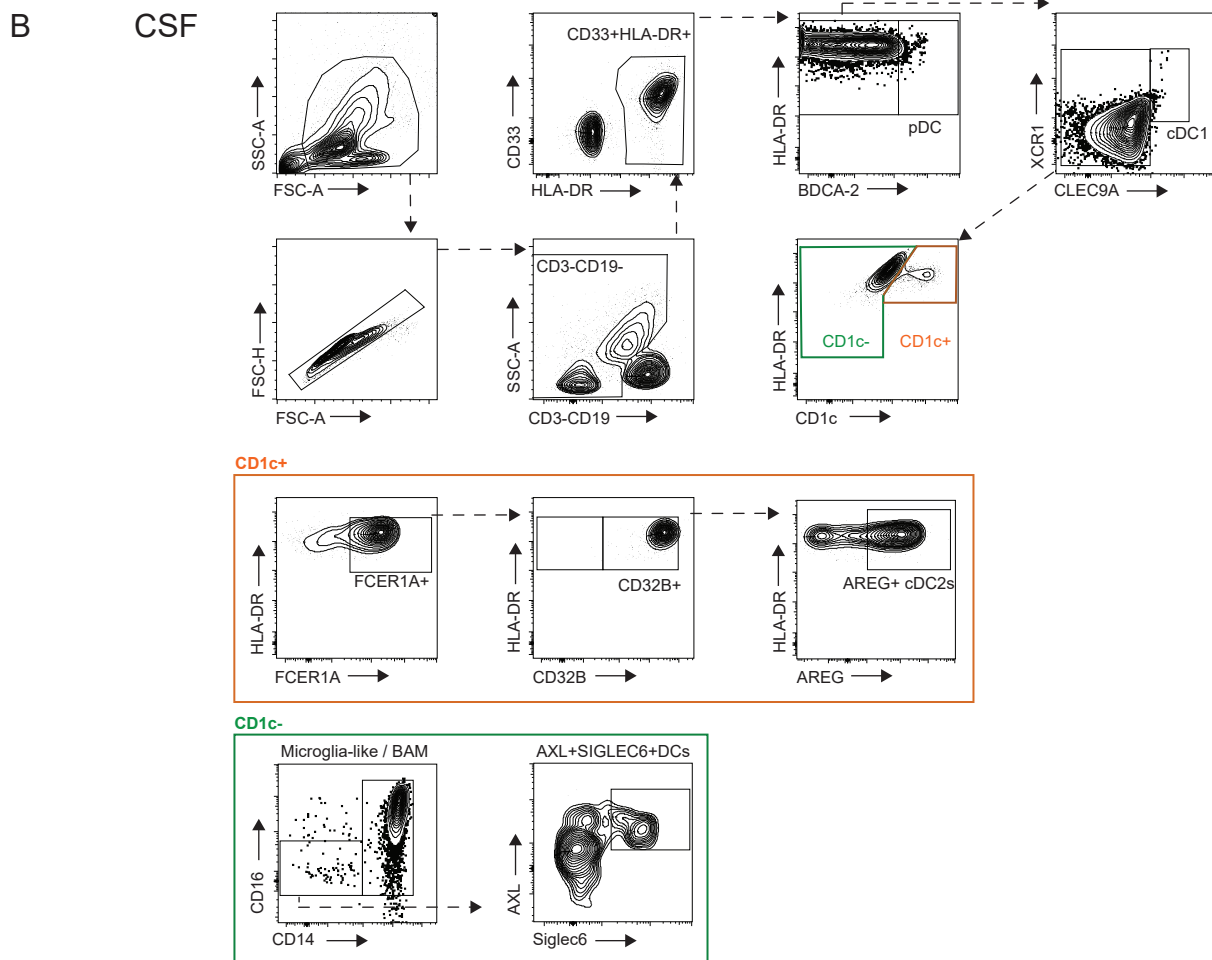

# Supplemental Figure 5

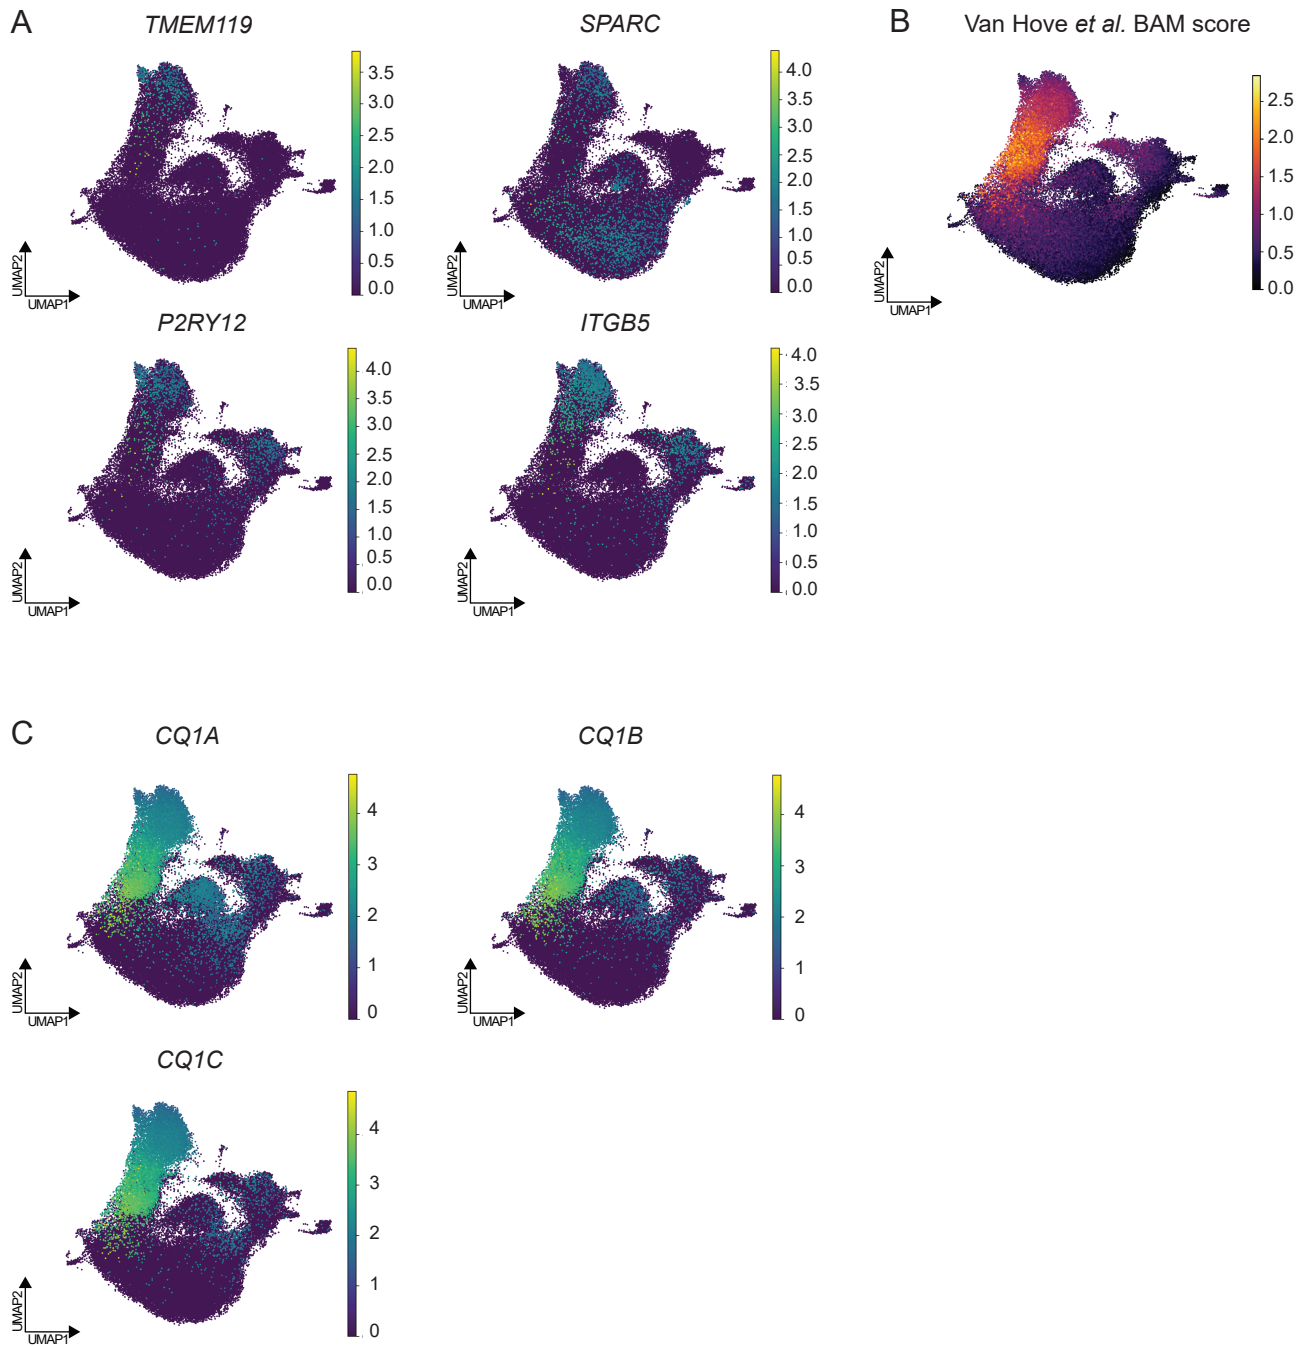

Supplemental Figure 6

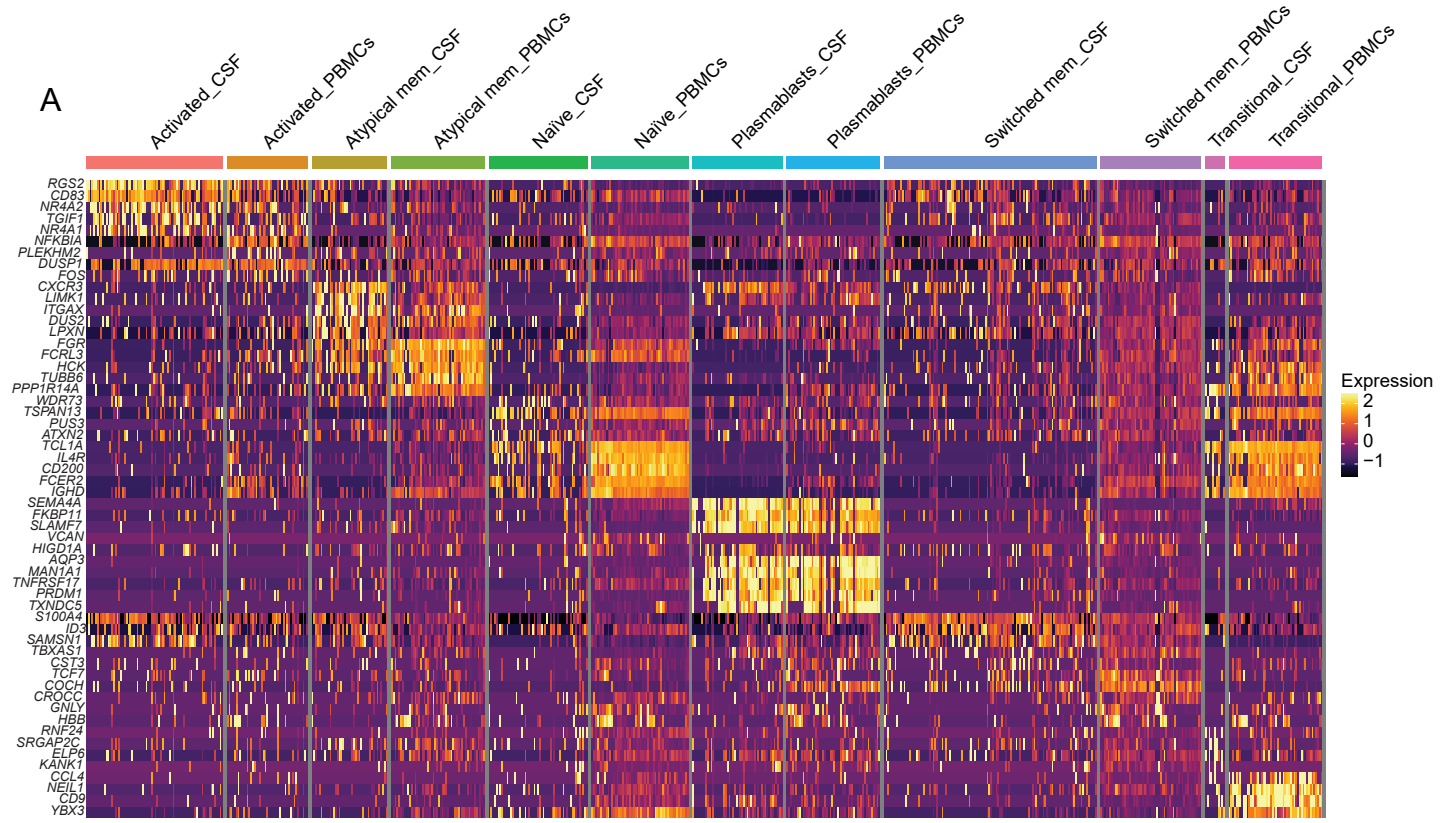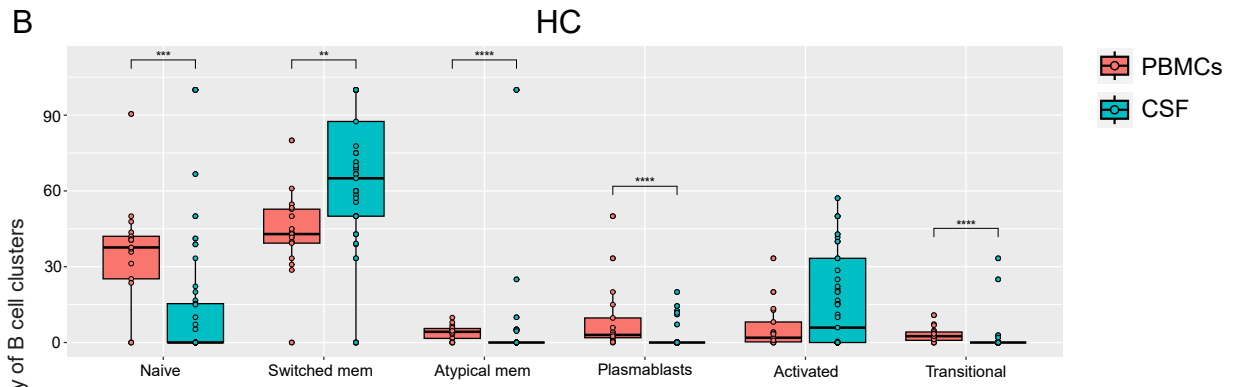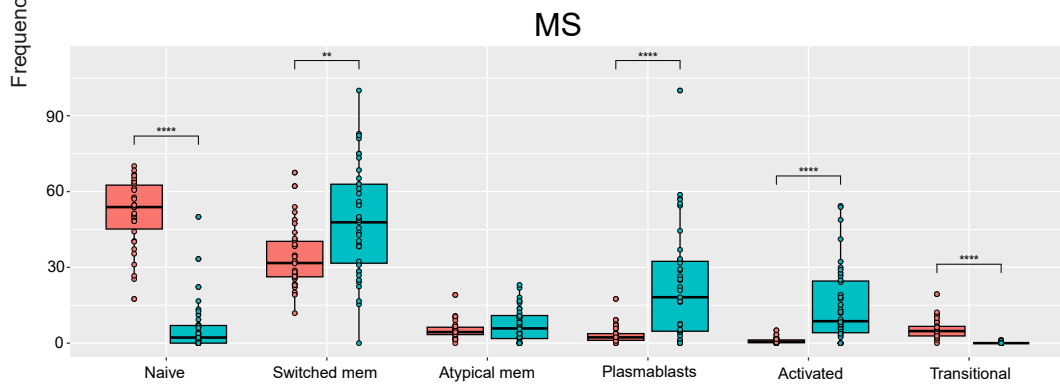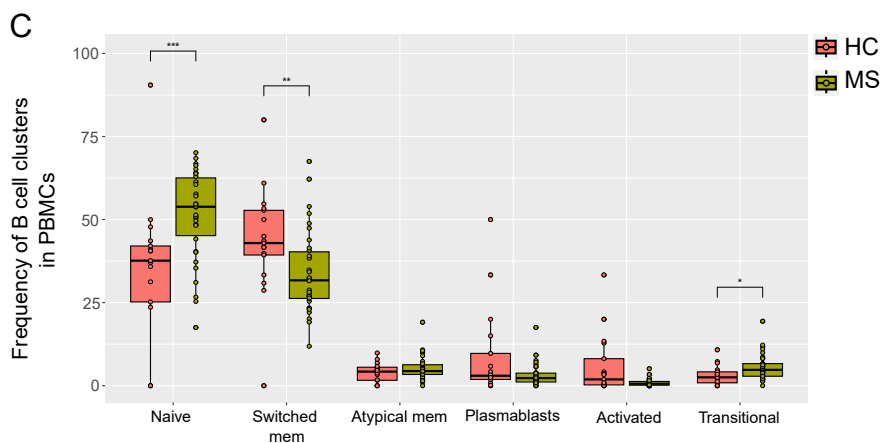

Supplemental Figure 7

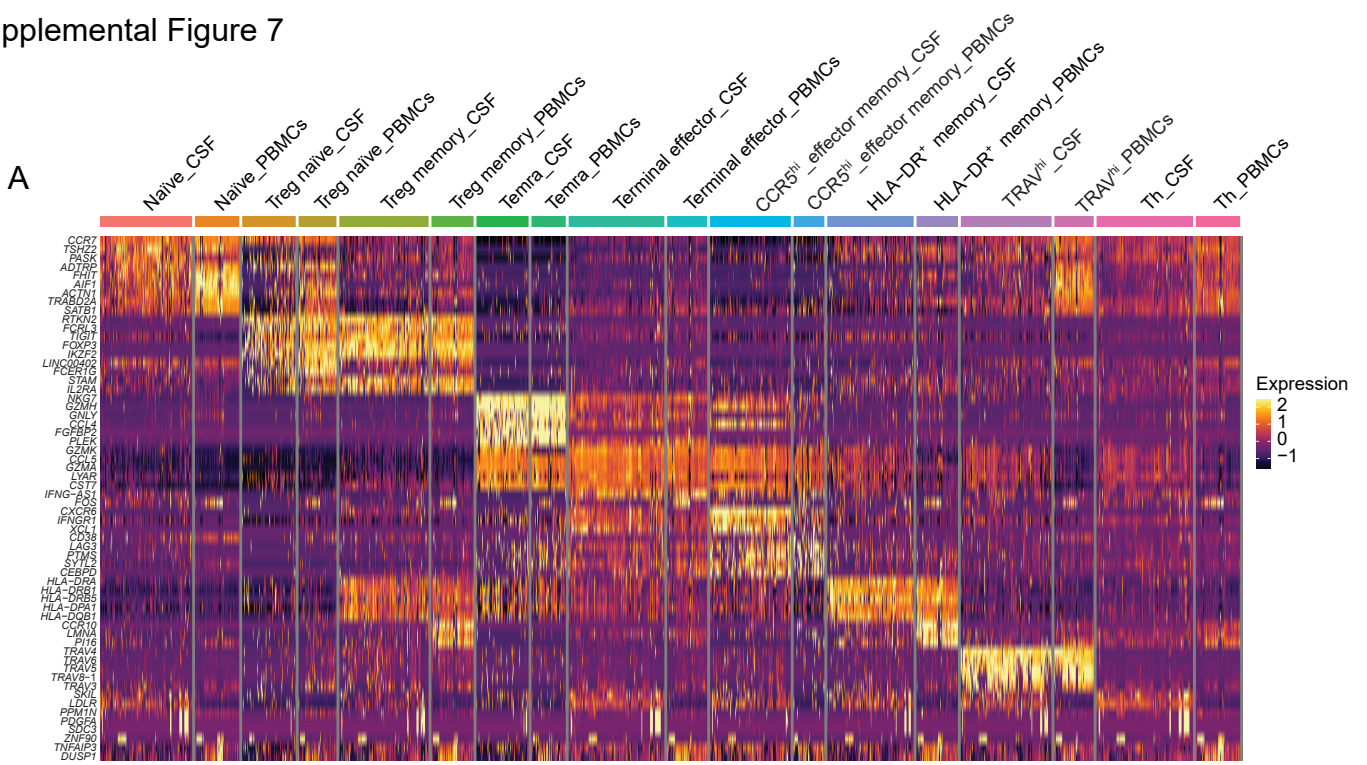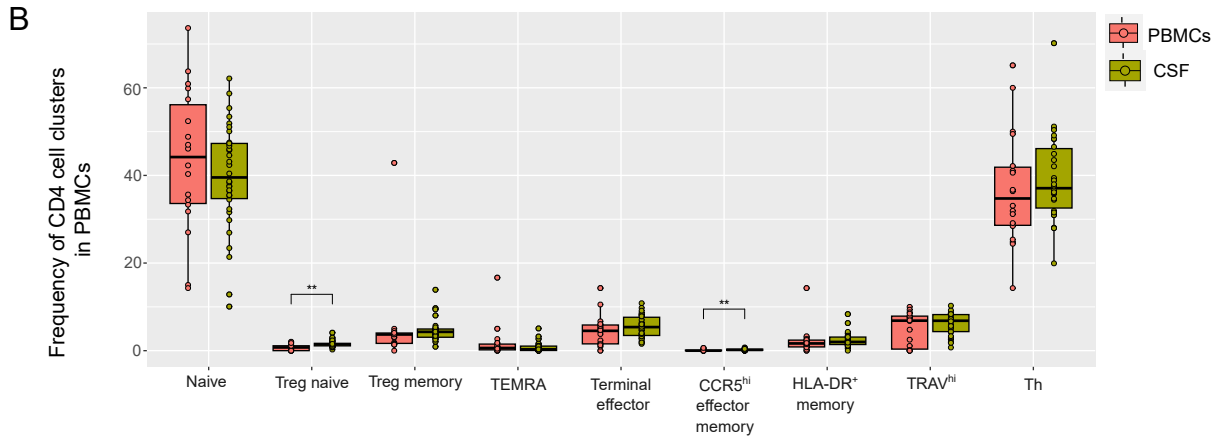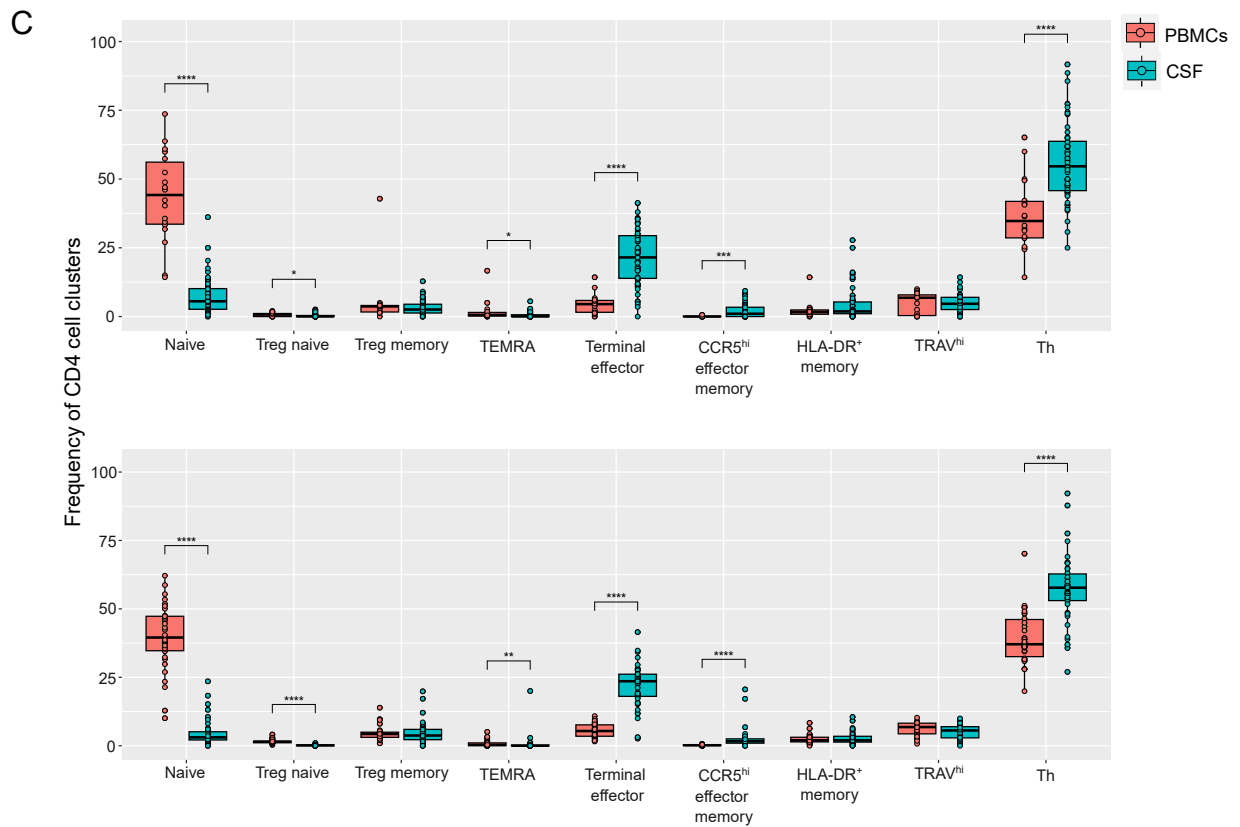

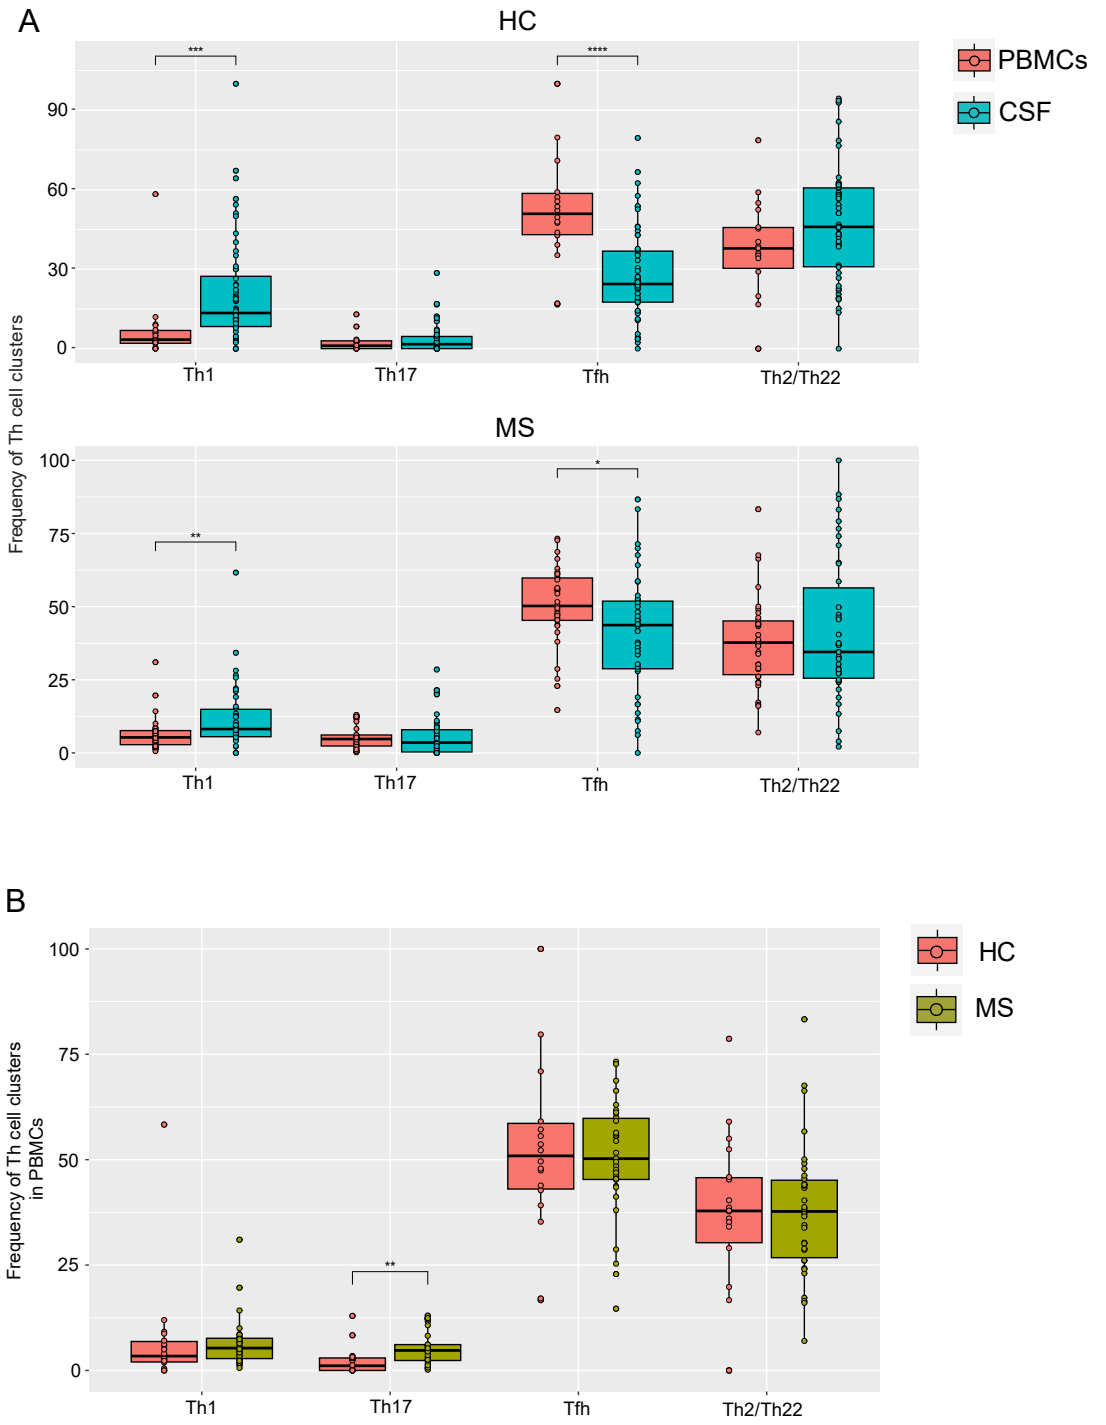

A

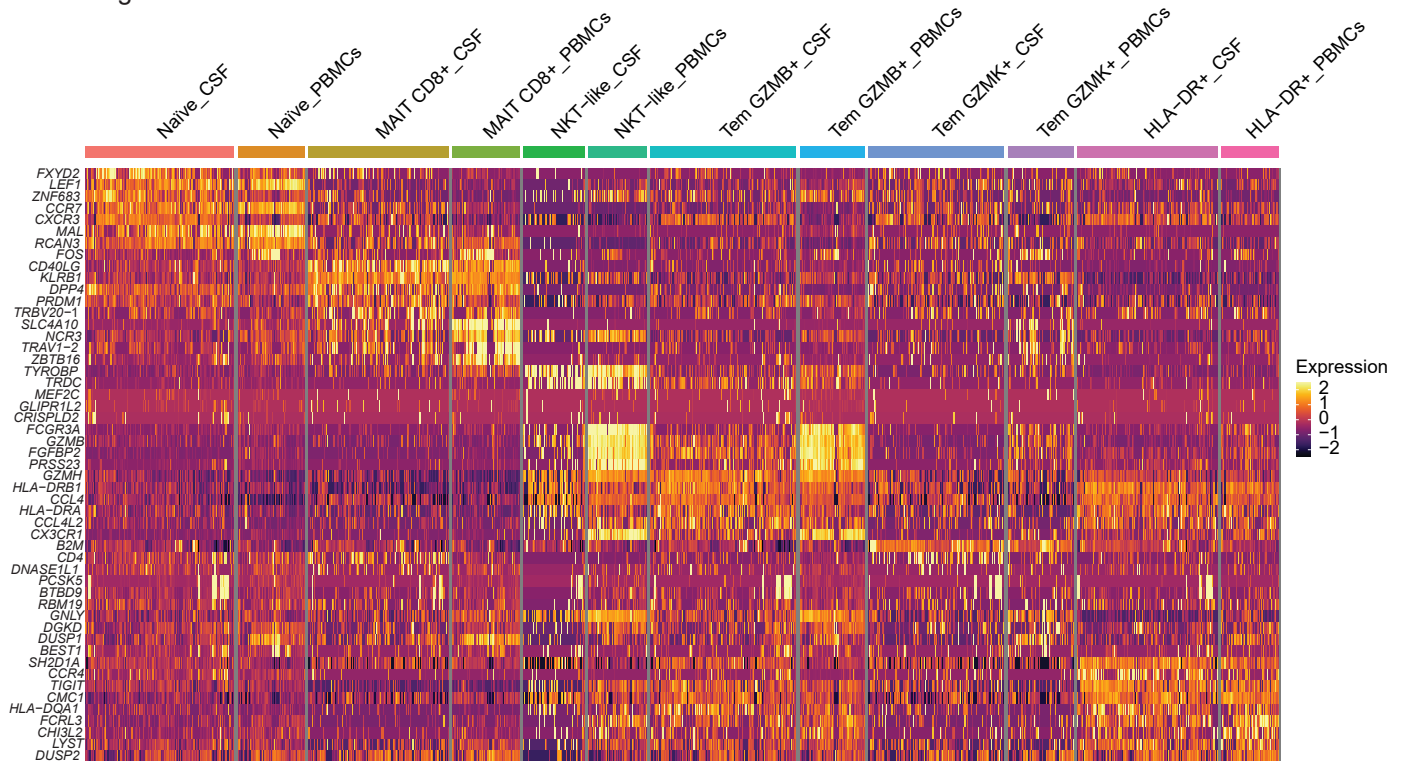

B

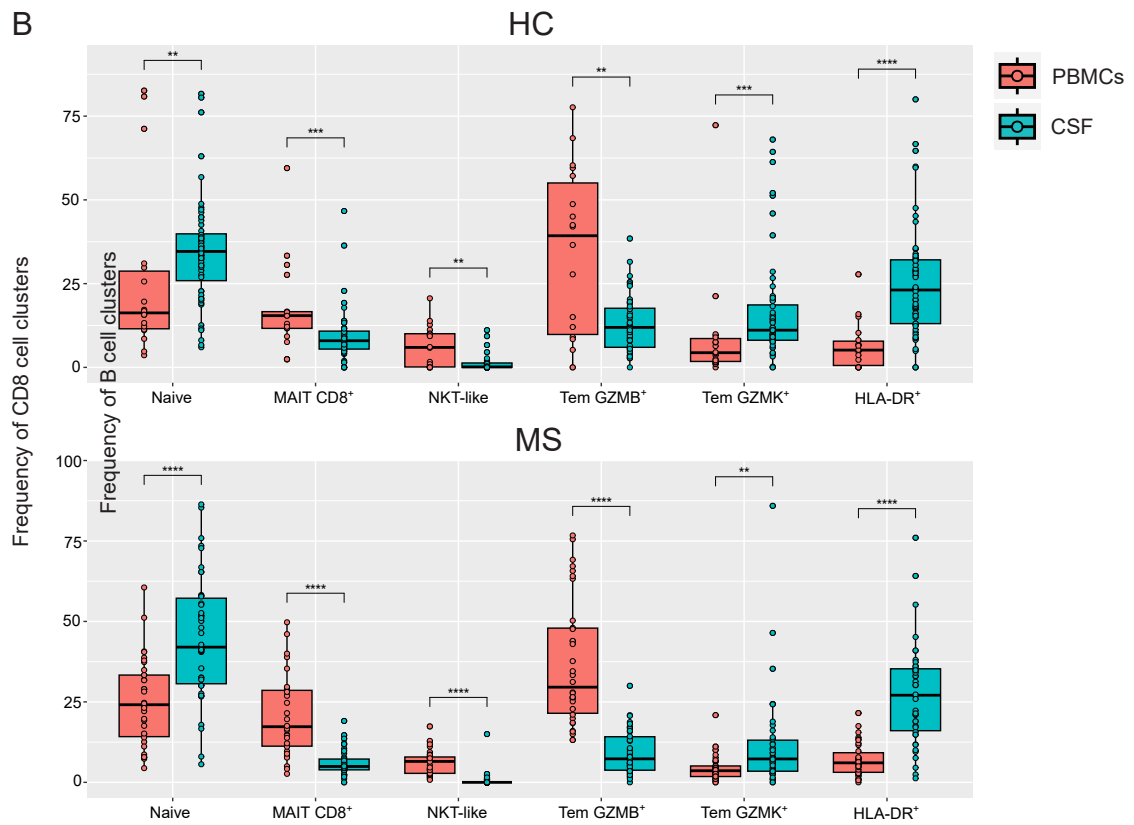

C

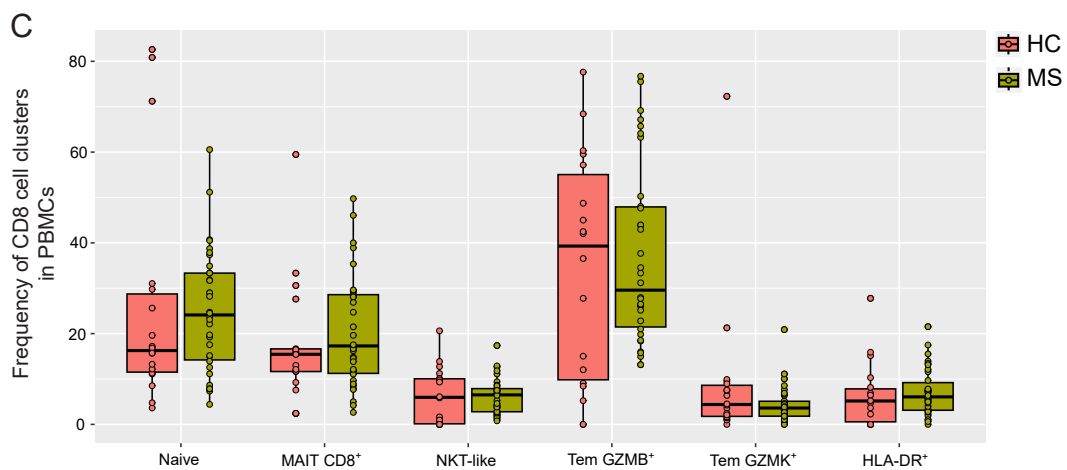

A

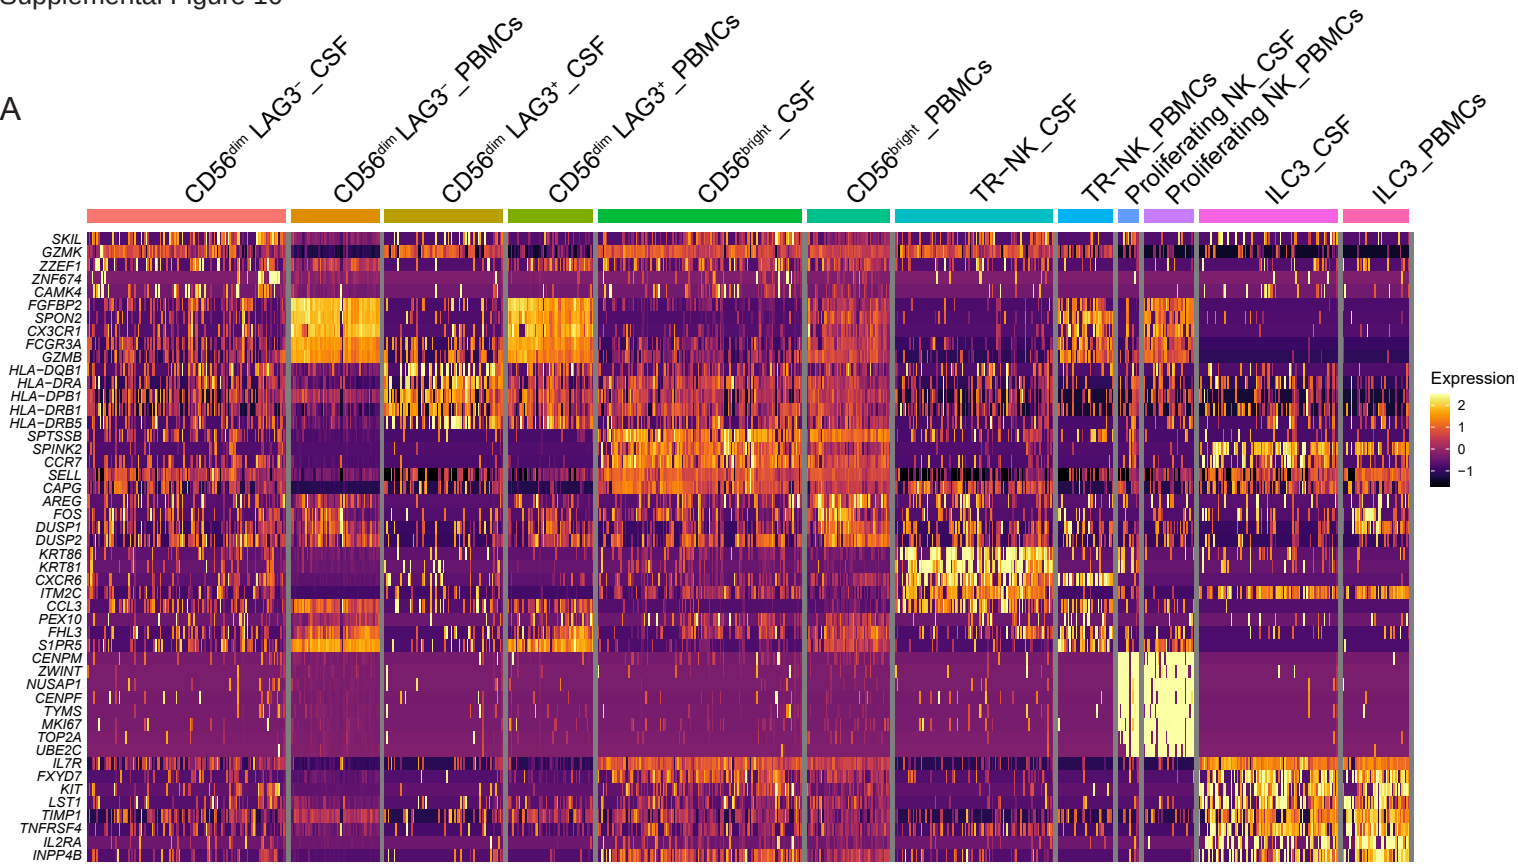

B

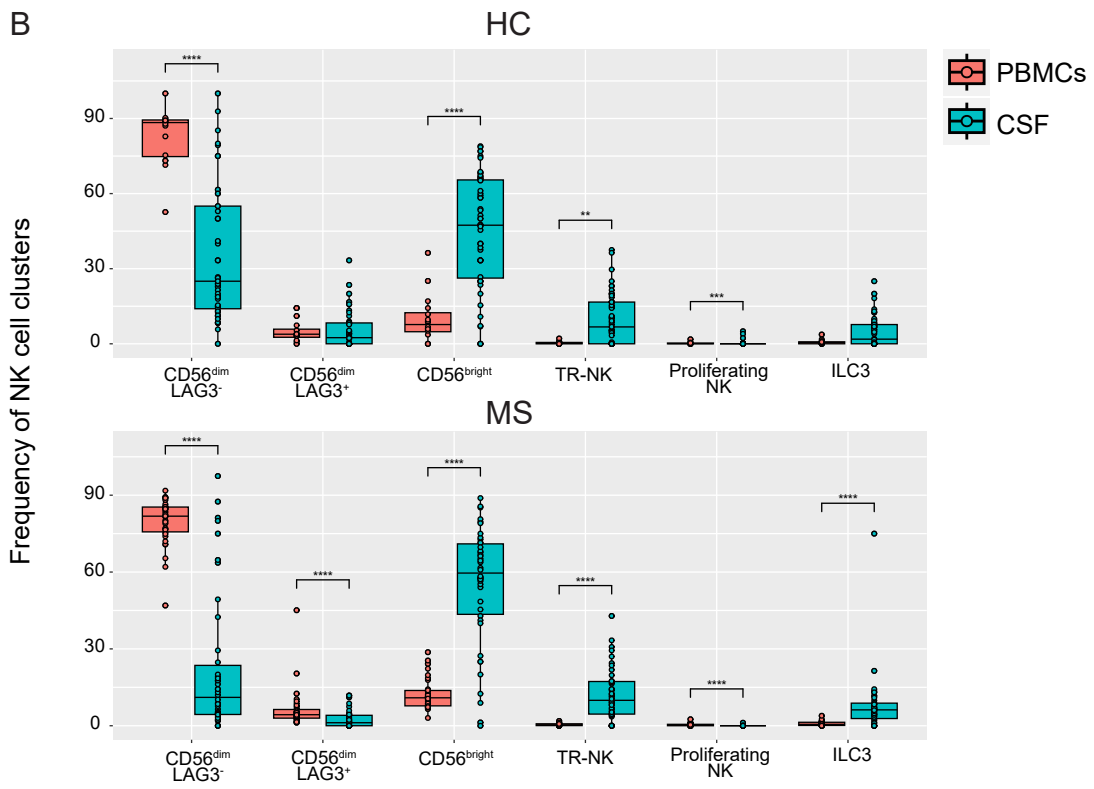

C

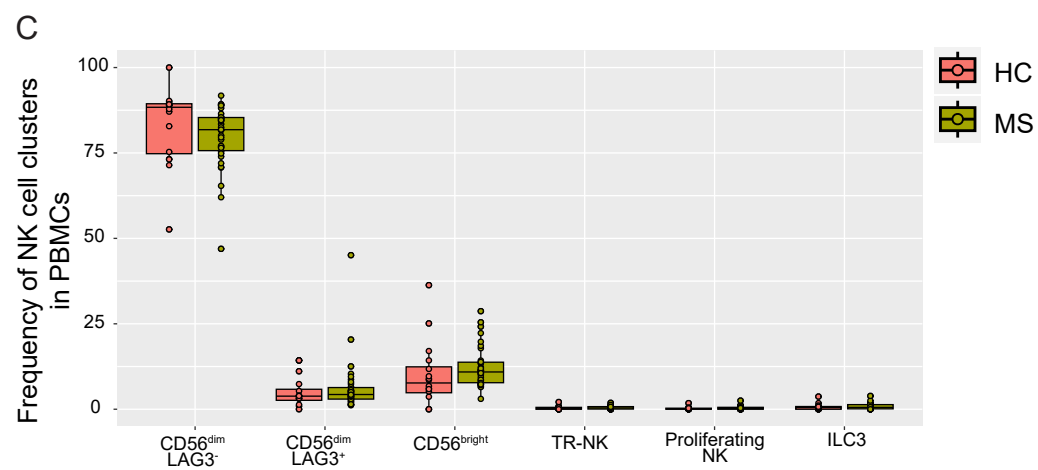

Supplemental Figure 11

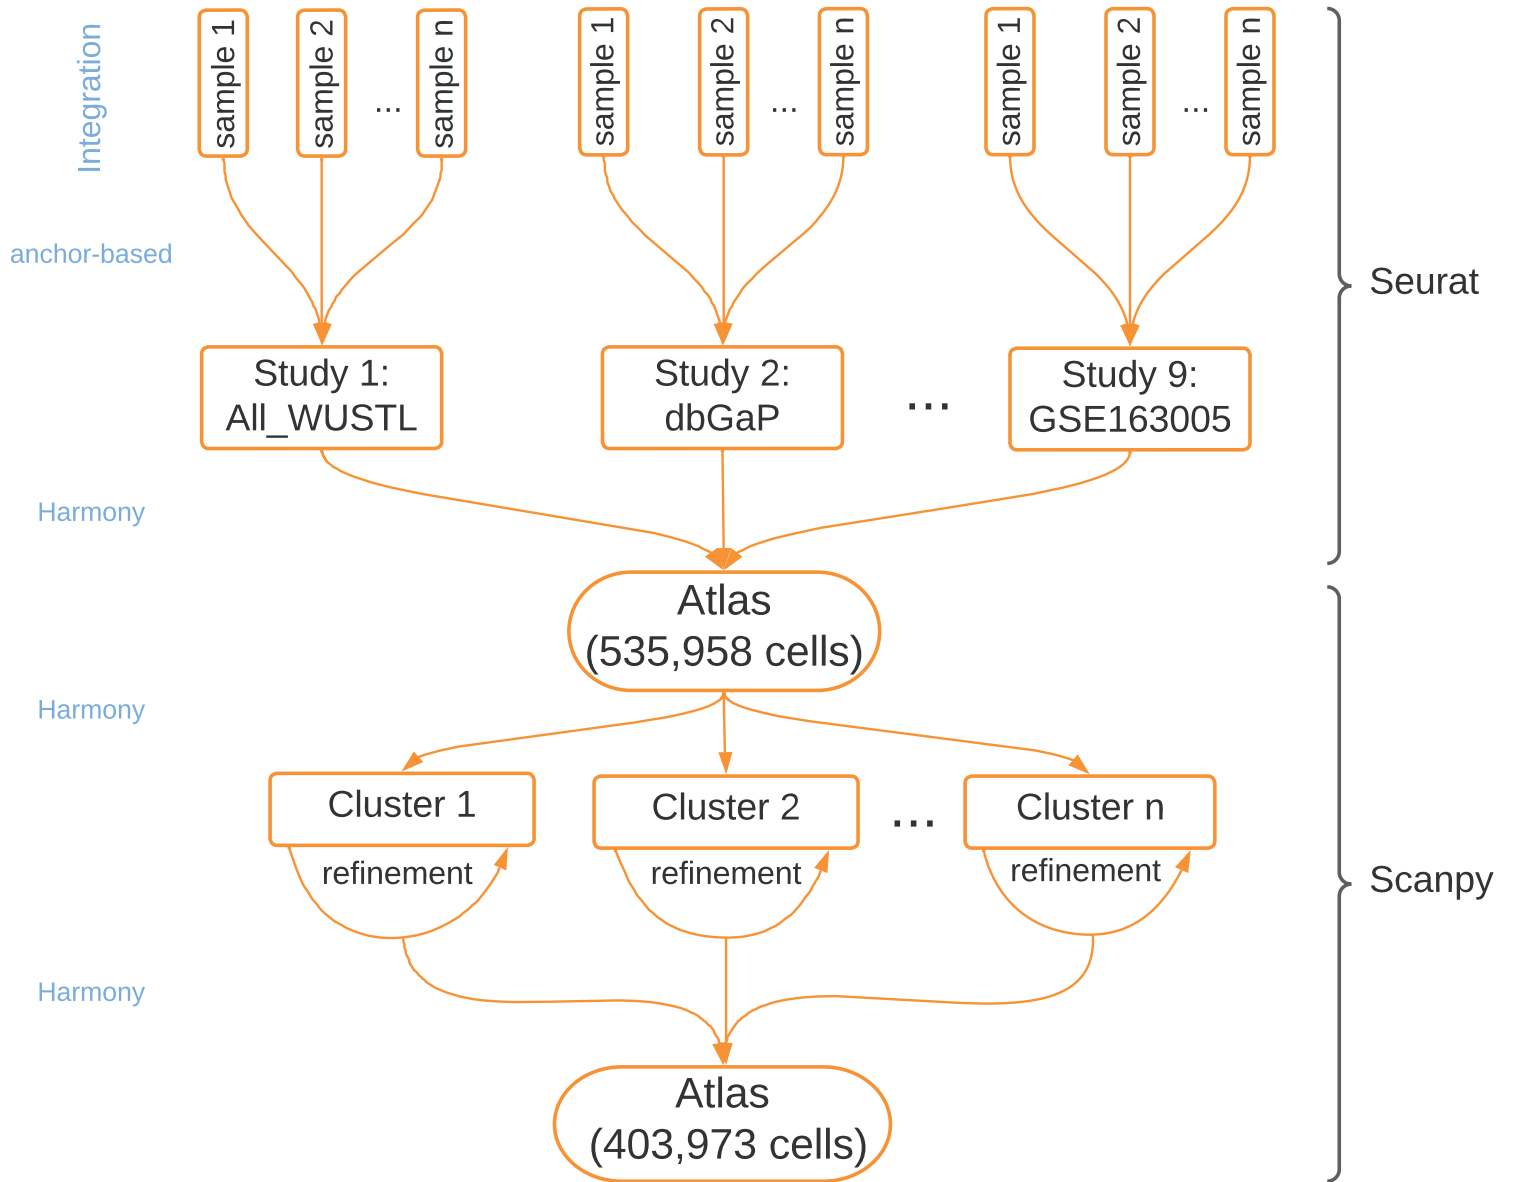

Supplement: sd1 [file 1]
